# Supplementary material for: Relaxation of stationary states on a quantum computer yields a unique spectroscopic fingerprint of the computer’s noise
Source: Springer Nature journal article supplement (doi:10.1038/s42005-022-00803-8), 2022-01-25
Supplement: 42005_2022_803_MOESM1_ESM.pdf [file 42005_2022_803_MOESM1_ESM.pdf]

# Supplementary Information: Relaxation of Stationary States on a Quantum Computer Yields a Unique Spectroscopic Fingerprint of the Computer's Noise

Scott E. Smart<sup>1</sup>, Zixuan Hu<sup>2</sup>, Sabre Kais<sup>2</sup>, and David A. Mazziotti<sup>1\*</sup>

*Department of Chemistry and The James Franck Institute,*

*The University of Chicago, Chicago, IL 60637 USA and*

*Department of Chemistry, Department of Physics, and Birck Nanotechnology Center,*

*Purdue University, West Lafayette, IN, 47907 USA*

(Dated: December 6, 2021)

## Contents

|                                            |   |
|--------------------------------------------|---|
| I. Alternative single-qubit Hamiltonians   | 2 |
| A. Comparison with $T_1$ relaxation times. | 3 |
| II. Quantum Device Specifications          | 4 |
| References                                 | 8 |

---

\* damazz@uchicago.edu

## Supplementary Note I: Alternative single-qubit Hamiltonians

As mentioned in the main text, we also looked at other single-qubit Hamiltonians, namely  $H_0 = \omega\sigma_x$  and  $H_0 = \omega\sigma_y$ , with the results in Supplementary Figure 1. For the  $\sigma_x$  and  $\sigma_y$  simulations, the higher frequency ( $\omega = 0.5$ ) appears to be more noisy, which might be due to increased variances in measurement noise, or a systematic error in a frame rotation. Regardless, a somewhat stationary oscillating behavior is observed for the higher frequency, whereas the lower frequency ( $\omega = 0.1$ ) is ‘pushed’ towards the center of the Bloch sphere. Scans of these trajectories also revealed similar trends, although we did not obtain as detailed data as in Figure 1 in the main text.

**Supplementary Figure 1.** Different trajectories for two frequencies,  $\omega = 0.5$  (blue) and  $\omega = 0.1$  (green), with three varying Hamiltonians: (a)  $H_0 = \omega\sigma_x$ ; (b)  $H_0 = \omega\sigma_y$ , and; (c)  $H_0 = \omega\sigma_z$ . Points were taken after 5 gate applications with each gate equal to  $\tau = 1/3$ .

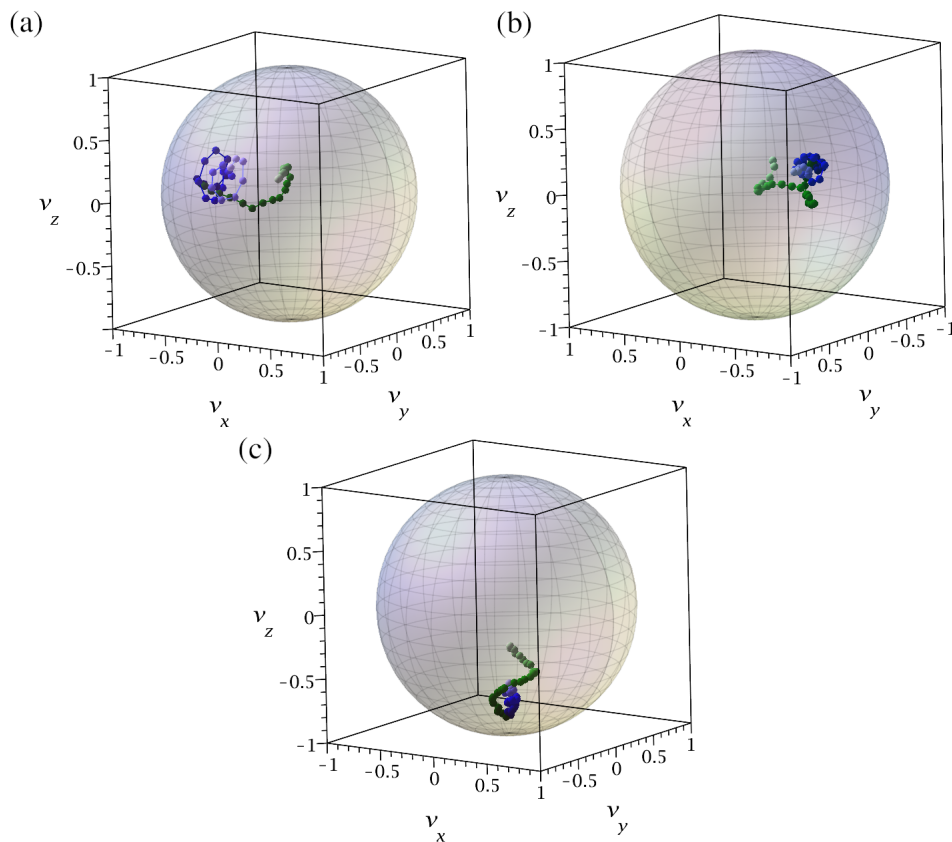

### A. Comparison with $T_1$ relaxation times.

Looking at individual quantum devices, in some instances we see a linear relation between the simulated  $T_1$  times, and the device  $T_1$  times. While we expect this to be the case for uniform systems, in some instances gate errors could be uniquely worse than corresponding qubit coherence times (which becomes more commonplace with multi-qubit gates). We give an example in Supplementary Figure 2, where we compare the relaxation of the ibmqbogota qubit system, and the simulated quantum system. Note, while one can perform parallel measurements of the  $T_1$  times, we found parallel simulation of the local qubit Hamiltonians introduced significant cross-qubit interactions, and so each relaxation time was measured separately.

**Supplementary Figure 2.**  $T_1$  times for the simulated system (vertical axis, unitless), and the ibmqbogota device. For the simulated system, the  $\exp[i\tau\hat{H}]$  operator was implemented 600 times, where  $\hat{H} = \sigma_z$  ( $\omega = 1$ ).  $2^{11}$  measurements were taken for each experiment.

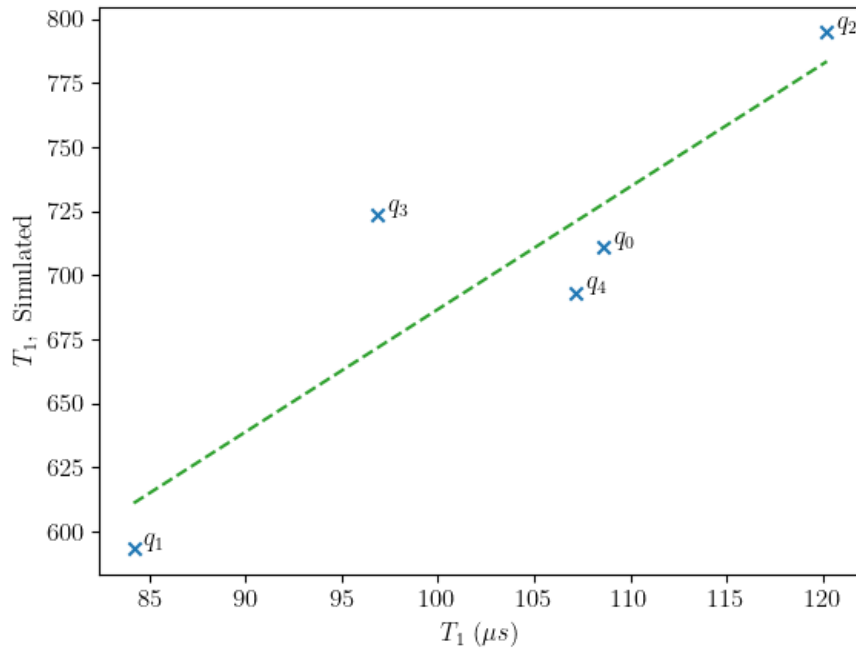

## Supplementary Note II: Quantum Device Specifications

For the quantum computations we use variety of devices provided through the IBM Quantum Experience. The particular results reported here were performed on ibmq armonk (single-qubit results) and ibmq rome. The devices use fixed-frequency transmon qubits with co-planer waveguide resonators [1, 2], and the Python package Qiskit (v 0.15.0, 0.17.1) [3] were used to interface with the device. Device properties can be found in Supplementary Tables I - VI.

In particular, we report the qubit frequency, errors in the  $U_2$  and  $U_3$  gates, as well as readout errors, and  $T_1$  and  $T_2$  qubit times. For connected devices we include data on the CNOT gates as well. While preparing this draft, the basis set of operations changed to  $\sqrt{X}$  and  $R_z$  gates, and so where appropriate we report the given performance of these gates.

**Supplementary Table I.** Calibration data for ibmq armonk taken over several days. Figure 1 and 2 were generated using data from 09-18-20, and Figure 3 and Supplementary Figure 1 were measured between 11-12-20 and 11-13-20.

| <b>Date</b> | <b>Frequency</b> | <b>U<sub>2</sub></b> | <b>U<sub>3</sub></b> | <b>RO<sub>0 1</sub></b> | <b>RO<sub>1 0</sub></b> | <b>T<sub>1</sub></b> | <b>T<sub>2</sub></b> |
|-------------|------------------|----------------------|----------------------|-------------------------|-------------------------|----------------------|----------------------|
|             | GHz              | 10 <sup>-4</sup>     | 10 <sup>-4</sup>     | 10 <sup>-2</sup>        | 10 <sup>-2</sup>        | <i>μs</i>            | <i>μs</i>            |
| 09-18-20    | 4.974            | 7.1                  | 14.3                 | 4.9                     | 6.1                     | 193.4                | 202.0                |
| 11-12-20    | 4.974            | 6.4                  | 12.7                 | 5.5                     | 4.4                     | 157.5                | 222.6                |
| 11-13-20    | 4.974            | 5.0                  | 10.0                 | 4.8                     | 3.9                     | 157.9                | 190.0                |

**Supplementary Table II.** Calibration from IBMQ Rome on 11-17-2020, used to generate Figure 4 in the main text.

| <b>Qubit</b> | <b>Frequency</b> | <b>U<sub>2</sub></b> | <b>U<sub>3</sub></b> | <b>RO<sub>0 1</sub></b> | <b>RO<sub>1 0</sub></b> | <b>T<sub>1</sub></b> | <b>T<sub>2</sub></b> | <b>[j] CNOT<sub>i</sub><sup>j</sup> (gate length)</b> |
|--------------|------------------|----------------------|----------------------|-------------------------|-------------------------|----------------------|----------------------|-------------------------------------------------------|
| i            | GHz              | 10 <sup>-4</sup>     | 10 <sup>-4</sup>     | 10 <sup>-2</sup>        | 10 <sup>-2</sup>        | μ s                  | μ s                  | 10 <sup>-2</sup> (ns)                                 |
| 0            | 4.969            | 2.5                  | 4.9                  | 2.5                     | 0.4                     | 68.9                 | 76.3                 | [1] 0.7 (320)                                         |
| 1            | 4.770            | 2.7                  | 5.4                  | 4.0                     | 3.0                     | 86.6                 | 65.9                 | [0] 0.7 (356)                                         |

**Supplementary Table III.** Calibration data from ibmq-bogota, taken on 09-16-2021. See Figure 6 in the main text.

| <b>Qubit</b> | <b>Frequency</b> | <b>√X</b>        | <b>X</b>         | <b>RO<sub>0 1</sub></b> | <b>RO<sub>1 0</sub></b> | <b>T<sub>1</sub></b> | <b>T<sub>2</sub></b> | <b>[j] CNOT<sub>i</sub><sup>j</sup> (gate length)</b> |
|--------------|------------------|------------------|------------------|-------------------------|-------------------------|----------------------|----------------------|-------------------------------------------------------|
| i            | GHz              | 10 <sup>-4</sup> | 10 <sup>-4</sup> | 10 <sup>-2</sup>        | 10 <sup>-2</sup>        | μ s                  | μ s                  | 10 <sup>-2</sup> (ns)                                 |
| 0            | 5.000            | 1.6              | 1.6              | 2.6                     | 1.0                     | 102.2                | 123.4                | [1] 0.8 (690)                                         |
| 1            | 4.850            | 2.3              | 2.3              | 2.2                     | 2.0                     | 81.4                 | 75.2                 | [0] 0.8 (654) [2] 0.9 (498)                           |
| 2            | 4.783            | 2.1              | 2.1              | 2.6                     | 0.7                     | 78.1                 | 115.5                | [1] 0.9 (533) [3] 3.5 (341)                           |
| 3            | 4.858            | 3.1              | 3.1              | 1.8                     | 0.5                     | 90.5                 | 148.7                | [2] 3.5 (306) [4] 0.8 (370)                           |
| 4            | 4.978            | 1.5              | 1.5              | 4.2                     | 0.9                     | 98.4                 | 171.2                | [3] 0.8 (334)                                         |

**Supplementary Table IV.** Single-qubit calibration data from ibm devices, taken on 09-18-2021.

See Figure 3 in the main text.

| <b>Backend</b> | <b>Qubit</b> | <b>Frequency</b> | $\sqrt{X}$ | $X$       | $\mathbf{RO}_{0 1}$ | $\mathbf{RO}_{1 0}$ | $\mathbf{T}_1$ | $\mathbf{T}_2$ |
|----------------|--------------|------------------|------------|-----------|---------------------|---------------------|----------------|----------------|
| i              | GHz          | $10^{-4}$        | $10^{-4}$  | $10^{-2}$ | $10^{-2}$           | $\mu$ s             | $\mu$ s        | $10^{-2}$ (ns) |
| armonk         | 0            | 4.972            | 1.9        | 1.9       | 3.3                 | 2.5                 | 166.4          | 188.5          |
| belem          | 0            | 5.090            | 1.6        | 1.6       | 8.0                 | 6.4                 | 104.2          | 115.4          |
|                | 1            | 5.245            | 7.0        | 7.0       | 13.7                | 4.7                 | 103.6          | 61.4           |
|                | 2            | 5.361            | 2.5        | 2.5       | 2.9                 | 1.0                 | 98.6           | 33.4           |
|                | 3            | 5.170            | 5.6        | 5.6       | 7.1                 | 1.2                 | 83.7           | 36.4           |
|                | 4            | 5.258            | 3.6        | 3.6       | 3.7                 | 0.9                 | 90.3           | 135.3          |
| bogota         | 0            | 5.000            | 1.7        | 1.7       | 1.8                 | 1.4                 | 104.9          | 136.2          |
|                | 1            | 4.850            | 2.3        | 2.3       | 2.3                 | 1.3                 | 77.3           | 69.4           |
|                | 2            | 4.783            | 1.9        | 1.9       | 2.3                 | 0.6                 | 118.5          | 186.3          |
|                | 3            | 4.858            | 3.0        | 3.0       | 2.7                 | 0.4                 | 95.4           | 162.3          |
|                | 4            | 4.978            | 1.4        | 1.4       | 2.7                 | 1.5                 | 104.0          | 190.7          |
| casablanca     | 0            | 4.822            | 2.4        | 2.4       | 4.0                 | 1.5                 | 41.1           | 37.5           |
|                | 1            | 4.760            | 2.3        | 2.3       | 3.5                 | 0.8                 | 34.7           | 79.2           |
|                | 2            | 4.906            | 3.4        | 3.4       | 5.1                 | 3.5                 | 100.2          | 235.9          |
|                | 3            | 4.879            | 3.0        | 3.0       | 2.2                 | 0.9                 | 73.7           | 143.6          |
|                | 4            | 4.871            | 2.6        | 2.6       | 3.8                 | 1.4                 | 89.0           | 67.6           |
|                | 5            | 4.964            | 1.8        | 1.8       | 1.7                 | 0.7                 | 88.8           | 172.1          |
|                | 6            | 5.177            | 3.9        | 3.9       | 5.3                 | 1.5                 | 72.9           | 68.5           |

## Supplementary References

---

- [1] J. Koch, T. M. Yu, J. Gambetta, A. A. Houck, D. I. Schuster, J. Majer, A. Blais, M. H. Devoret, S. M. Girvin, and R. J. Schoelkopf, Charge-insensitive qubit design derived from the Cooper pair box, *Phys. Rev. A* **76**, 042319 (2007).
- [2] J. M. Chow, A. D. Córcoles, J. M. Gambetta, C. Rigetti, B. R. Johnson, J. A. Smolin, J. R. Rozen, G. A. Keefe, M. B. Rothwell, M. B. Ketchen, and M. Steffen, Simple all-microwave entangling gate for fixed-frequency superconducting qubits, *Phys. Rev. Lett.* **107**, 080502 (2011).
- [3] H. Abraham, AduOffei, R. Agarwal, I. Y. Akhalwaya, G. Aleksandrowicz, T. Alexander, M. Amy, E. Arbel, Arijit02, A. Asfaw, A. Avkhadiev, C. Azaustre, AzizNgoueya, A. Banerjee, A. Bansal, P. Barkoutsos, G. Barron, G. S. Barron, L. Bello, Y. Ben-Haim, D. Bevenius, A. Bhobe, L. S. Bishop, *et al.*, Qiskit: An open-source framework for quantum computing (2019).
